# Supplementary material for: Machine Learning Technology Reveals the Concealed Interactions of Phytohormones on Medicinal Plant In Vitro Organogenesis
Source: Biomolecules. 2020 May 11;10(5):746. doi: 10.3390/biom10050746 (PMC7278175; doi:10.3390/biom10050746)
Supplement: Supplementary file 1 [file biomolecules-10-00746-s001.pdf]

## Supplementary Material

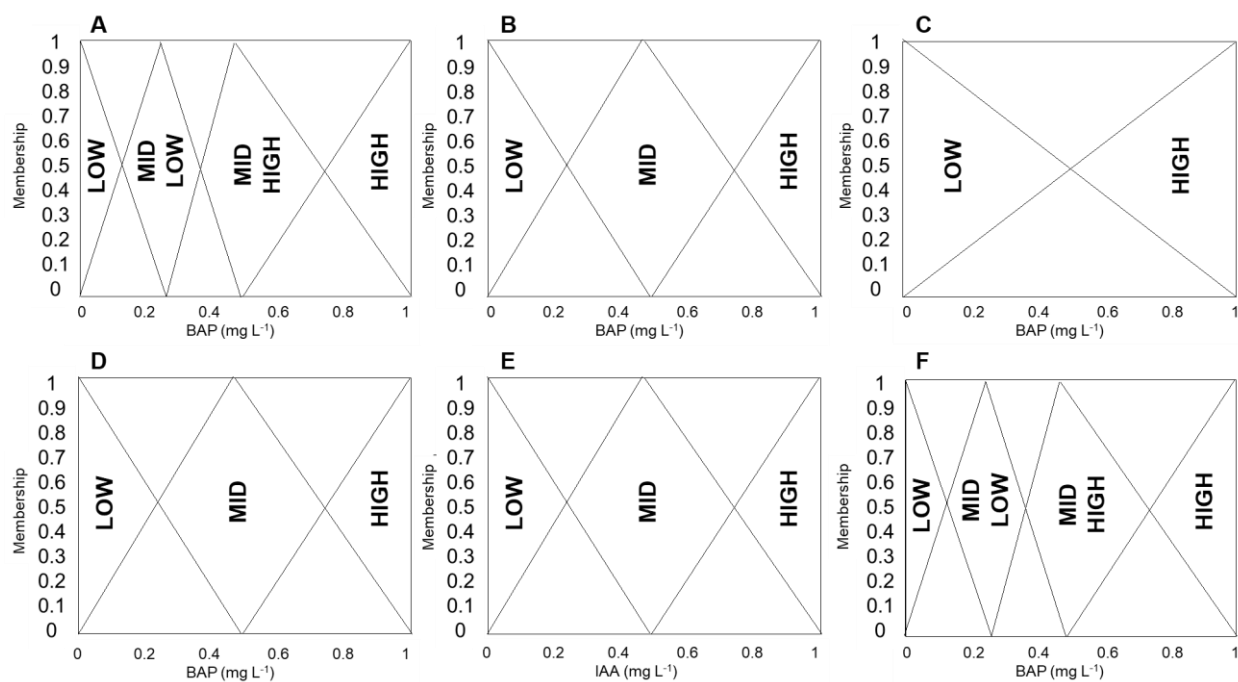

**Figure S1.** Graphical interpretation of phytohormone concentration ranging provided by FormRules® for each output: (A) BAP concentrations for %DS; (B) BAP concentration for %IS; (C) BAP concentration for NDS; (D) BAP concentration for NIS; (E) IAA concentration for NIS; (F) BAP concentration for %CAL.
